# Supplementary material
Source: PubMed Central journal article supplement (PMC7441487)

**Figure S7.**

**A**

**SARS-CoV-2 M<sup>pro</sup> (DMSO control)**

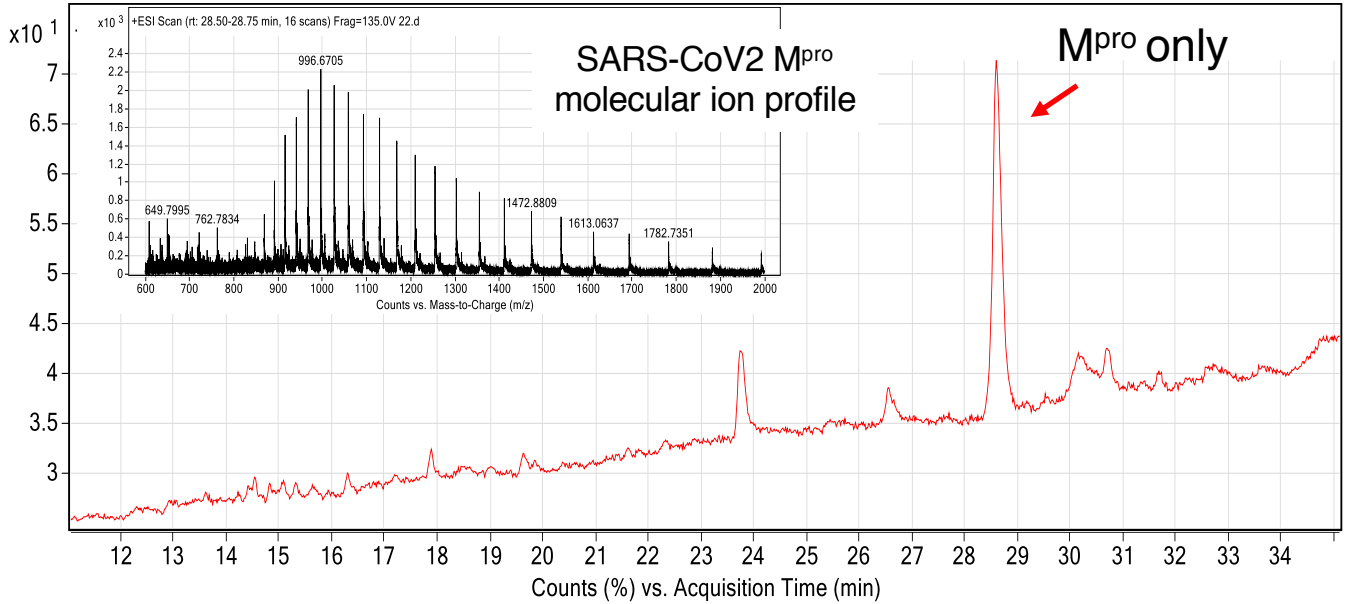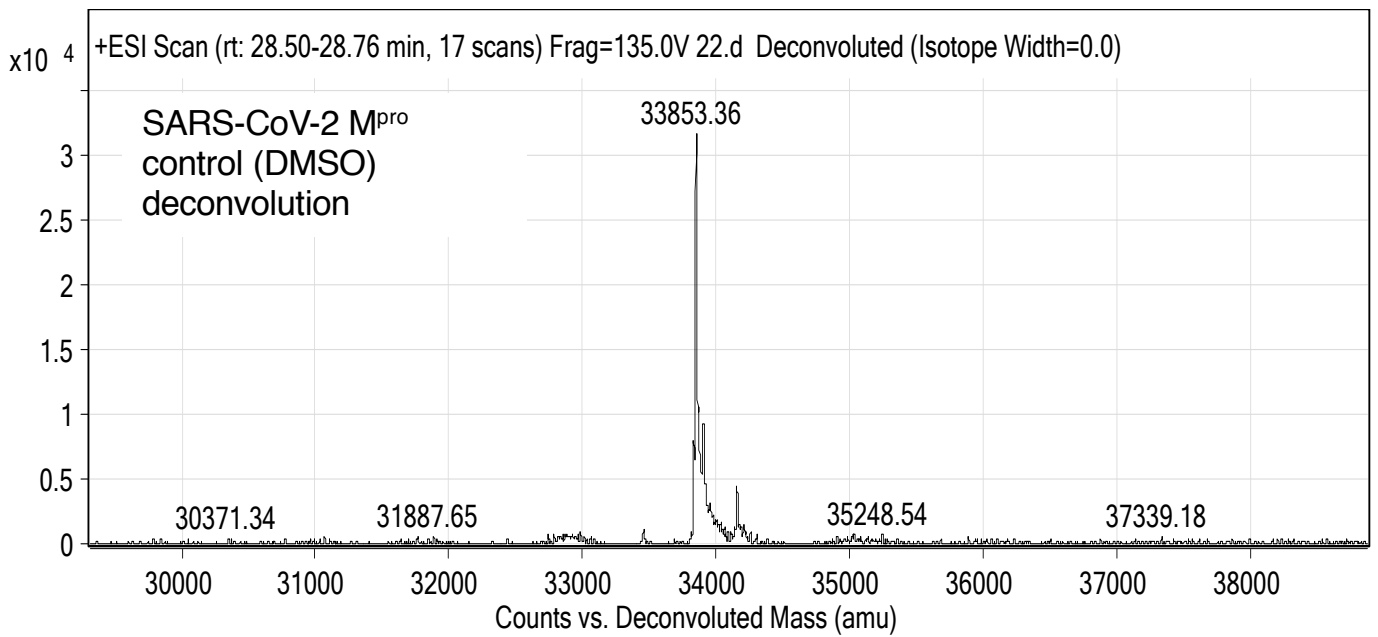

**Figure S7.**

**B**

**SARS-CoV-2 M<sup>pro</sup> with GRL-0920**

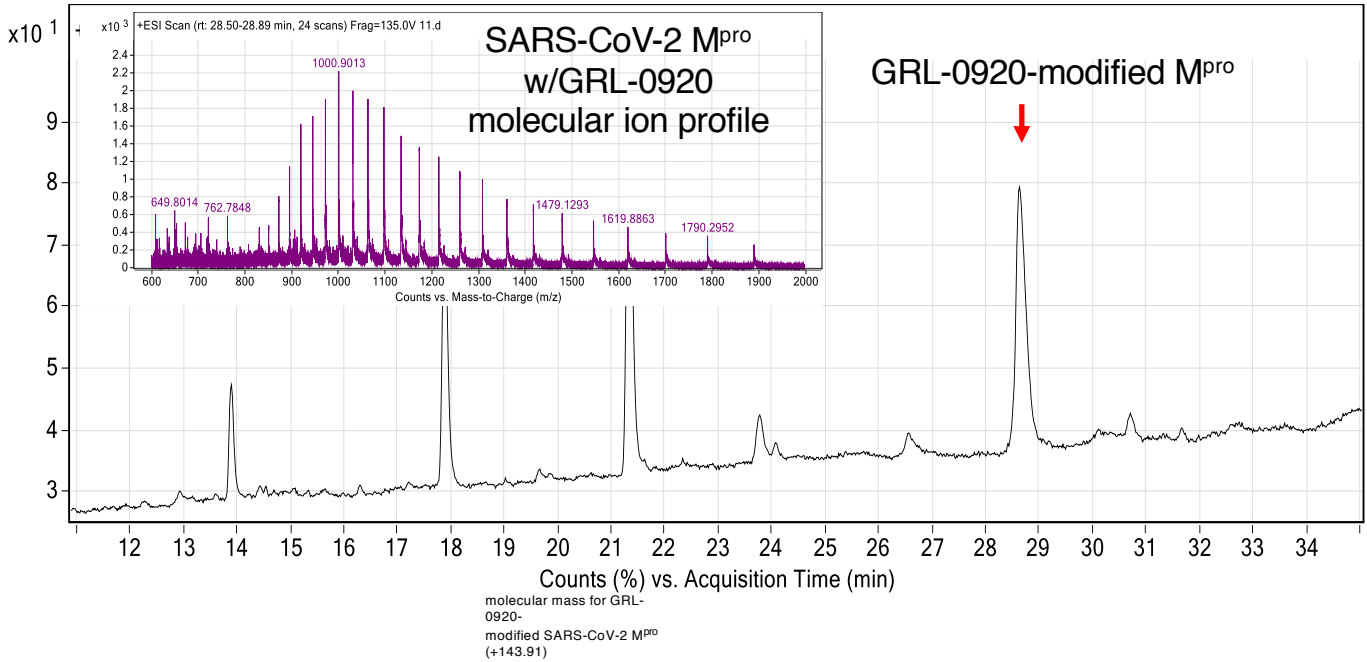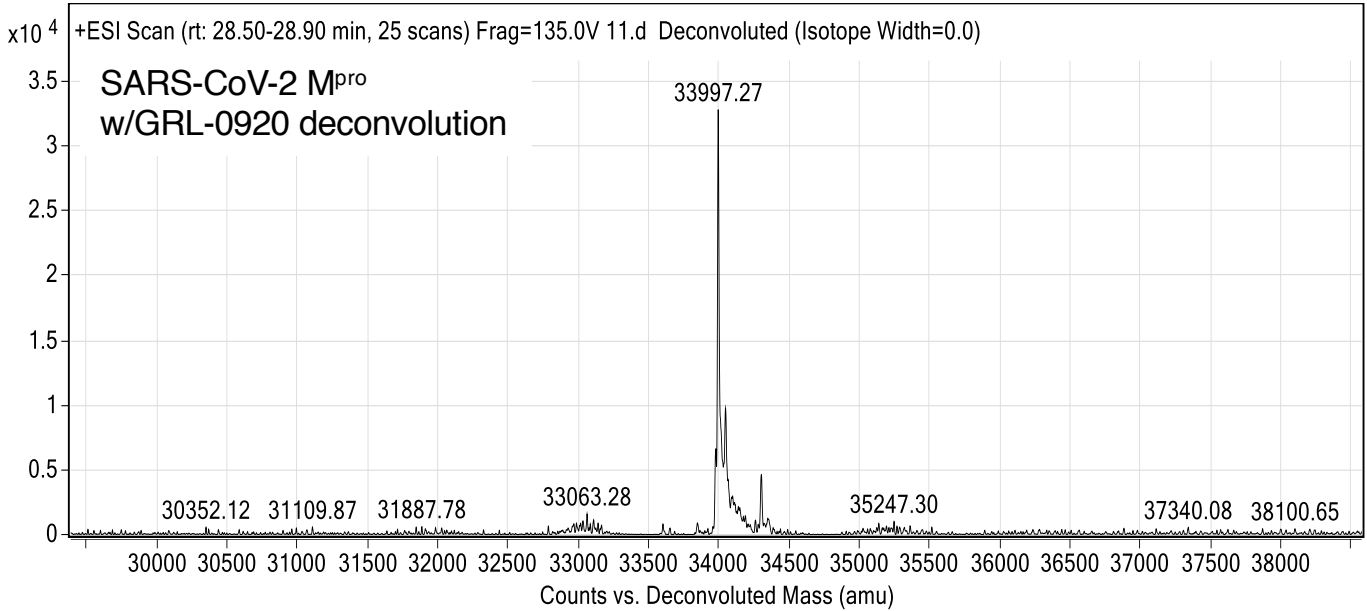

**Figure S7.**

**C**

**SARS-CoV-2 M<sup>pro</sup> with GRL-0820**

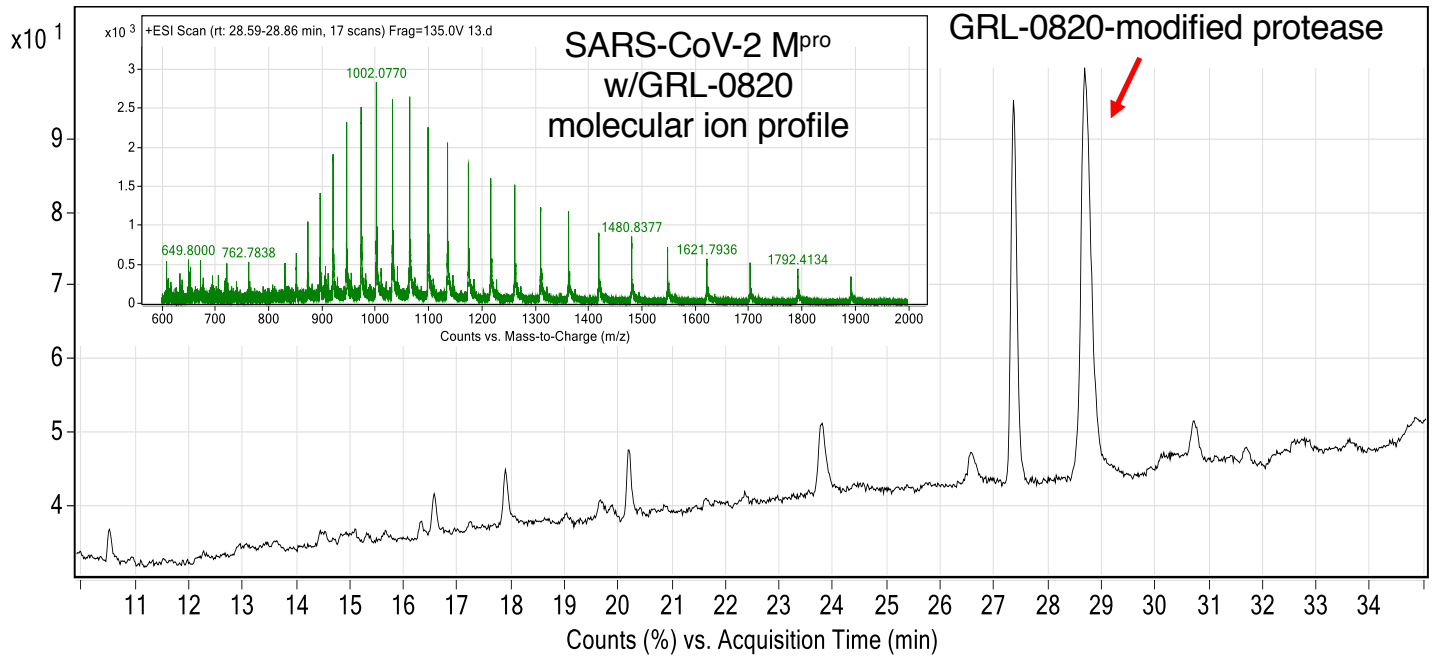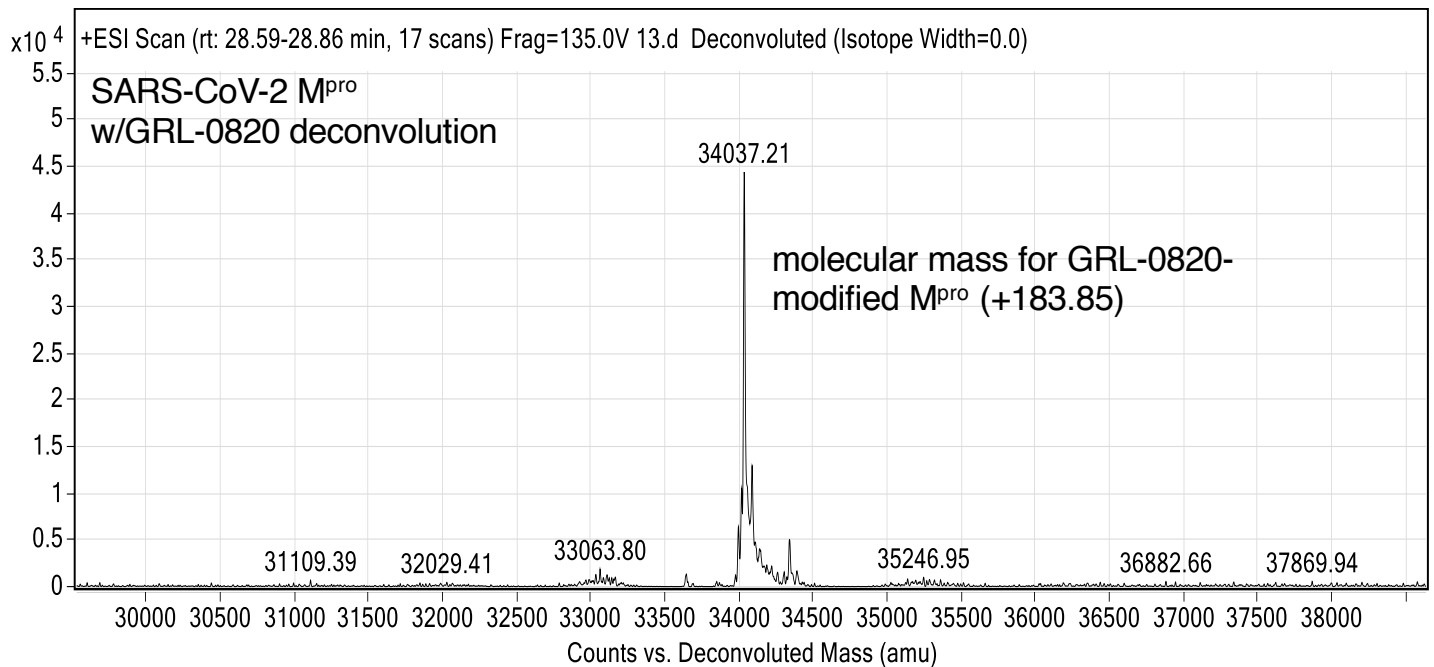

Supplement: mBio.01833-20-sf007.pdf [file mBio.01833-20-sf007.pdf]
