# Supplementary material
Source: PubMed Central journal article supplement (PMC7441487)

**Figure S1.**

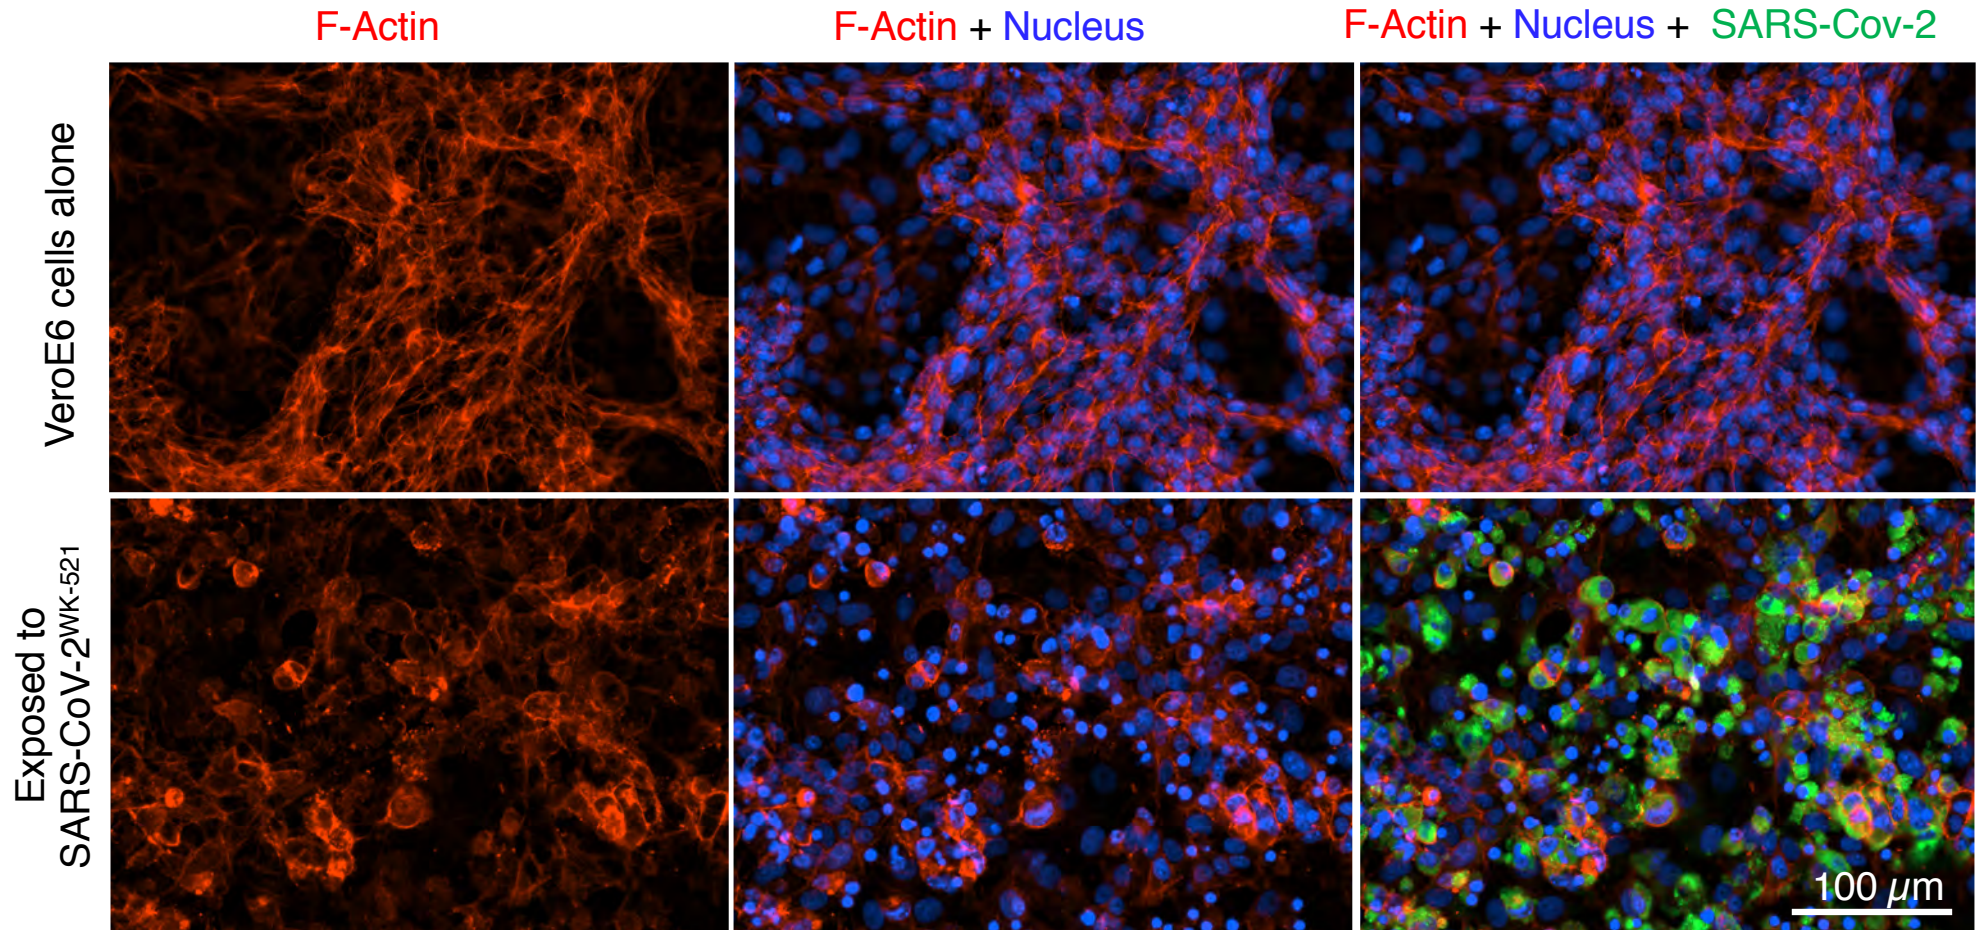

Supplement: mBio.01833-20-sf001.pdf [file mBio.01833-20-sf001.pdf]

**Figure S2.**

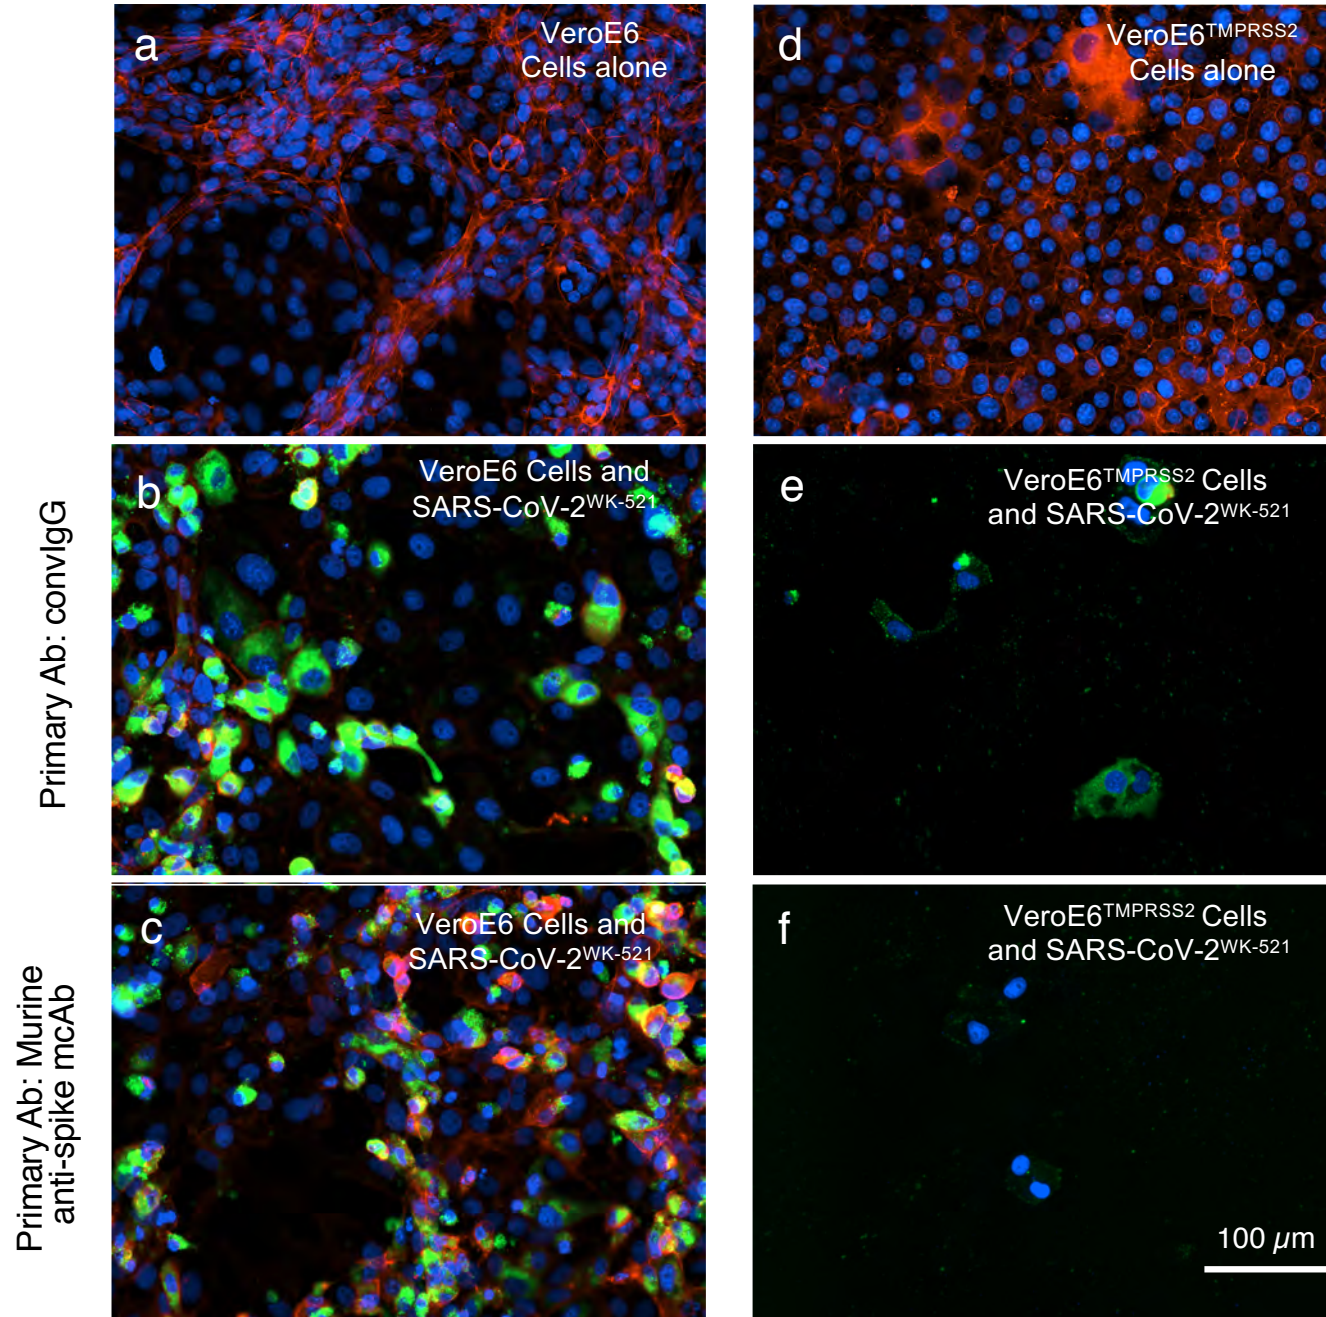

Supplement: mBio.01833-20-sf002.pdf [file mBio.01833-20-sf002.pdf]

# Figure S4.

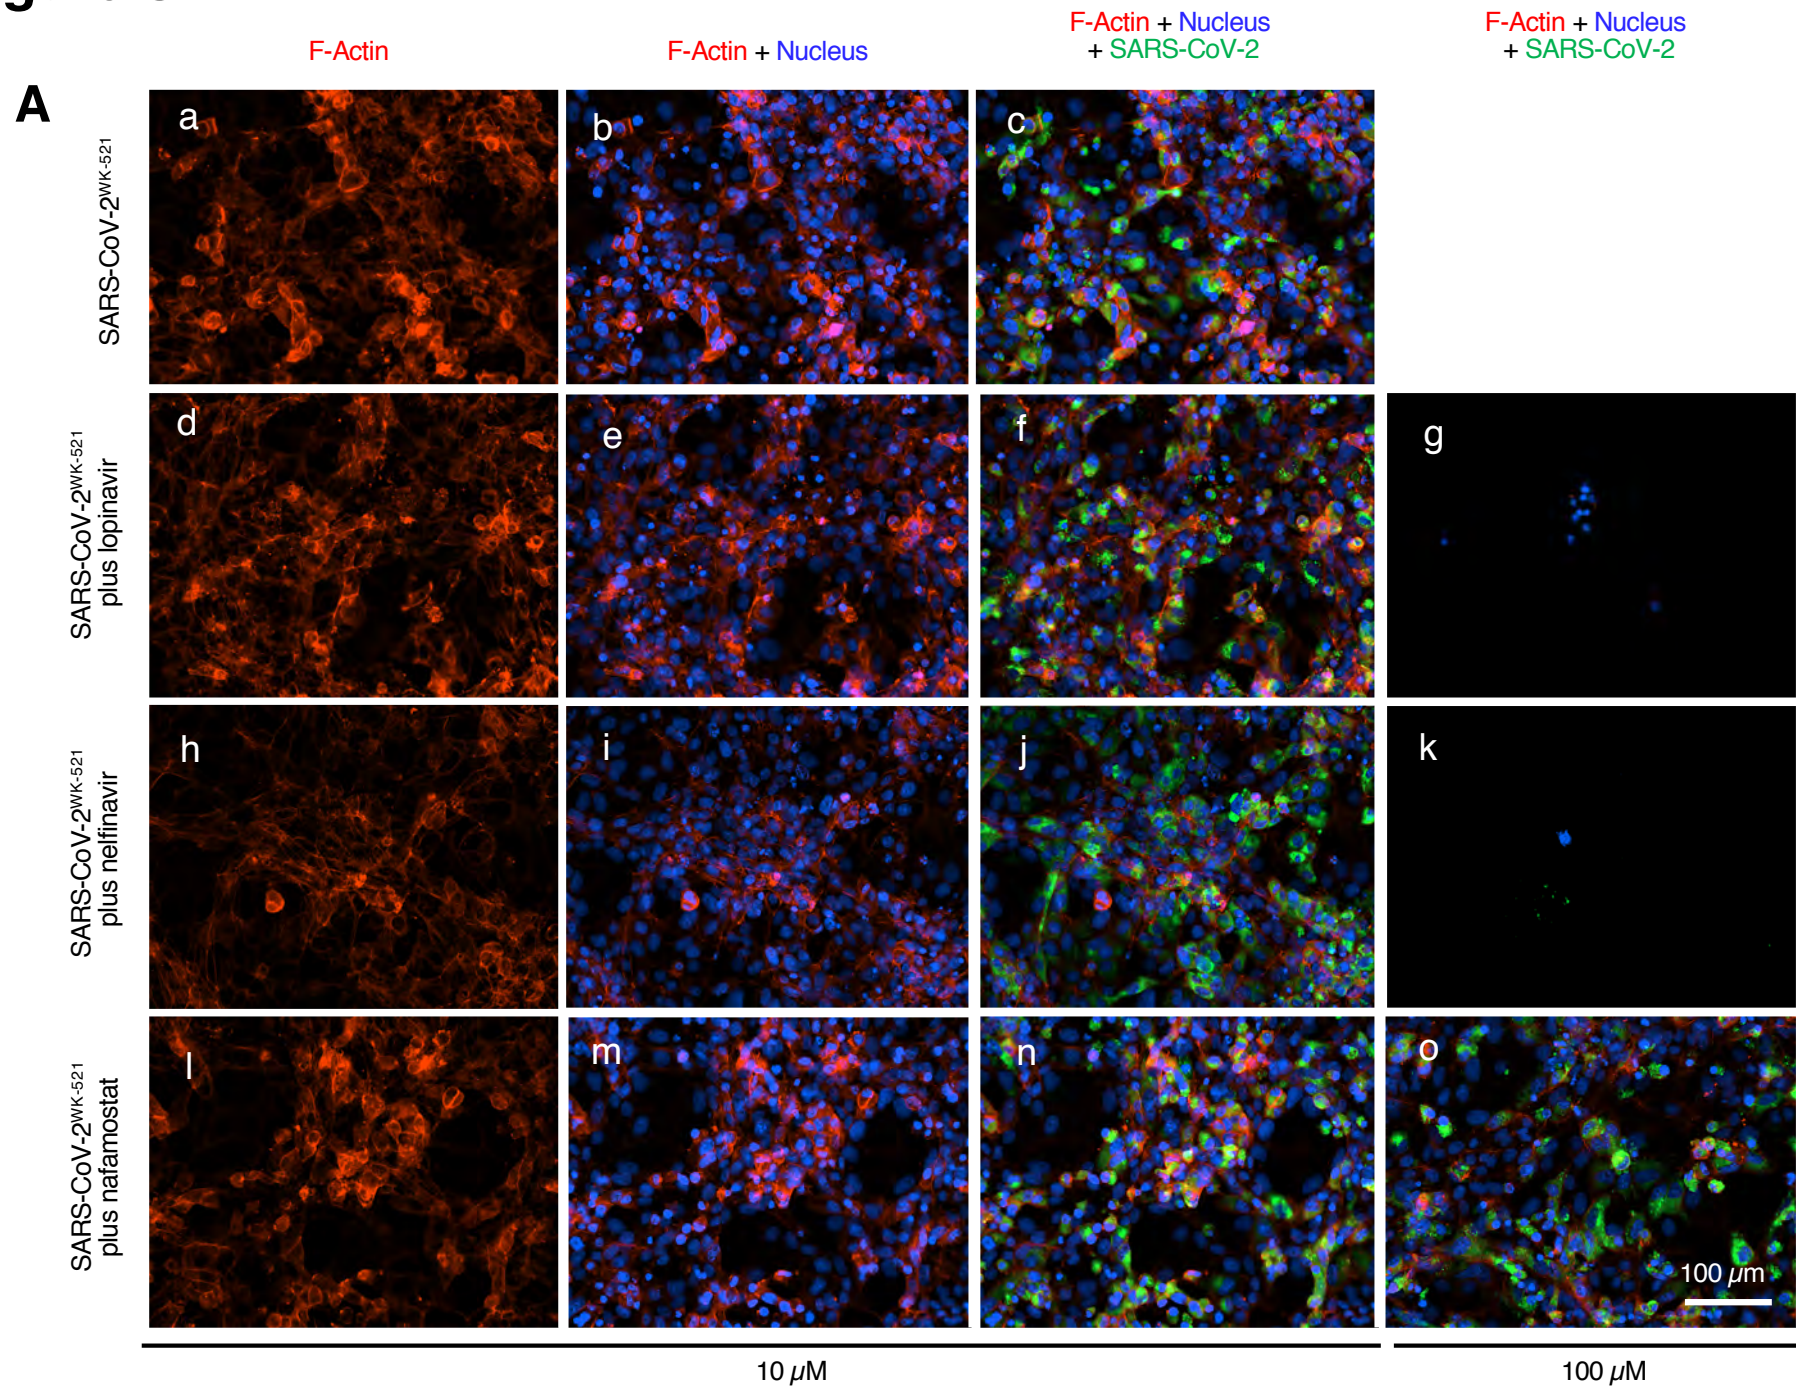

# Figure S4.

## B

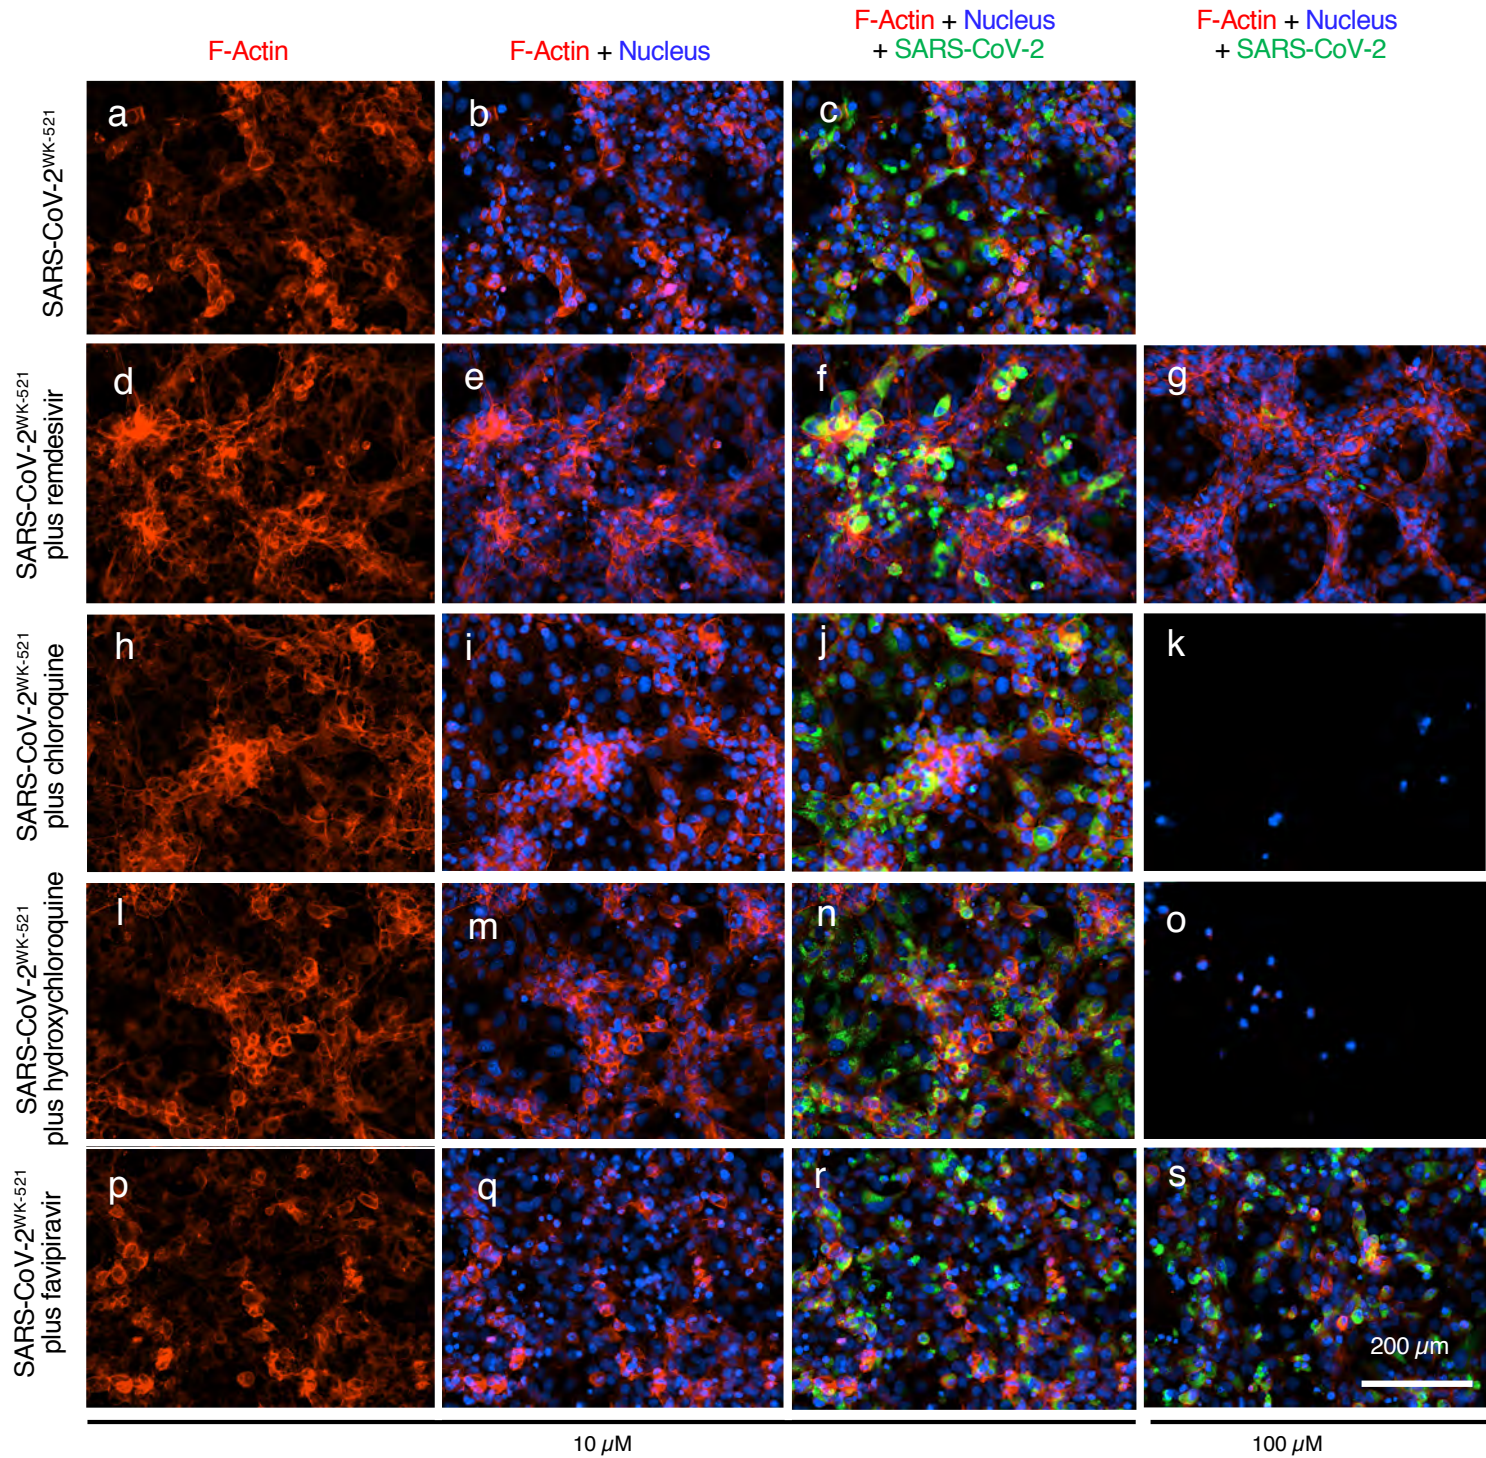

**Figure S4.**

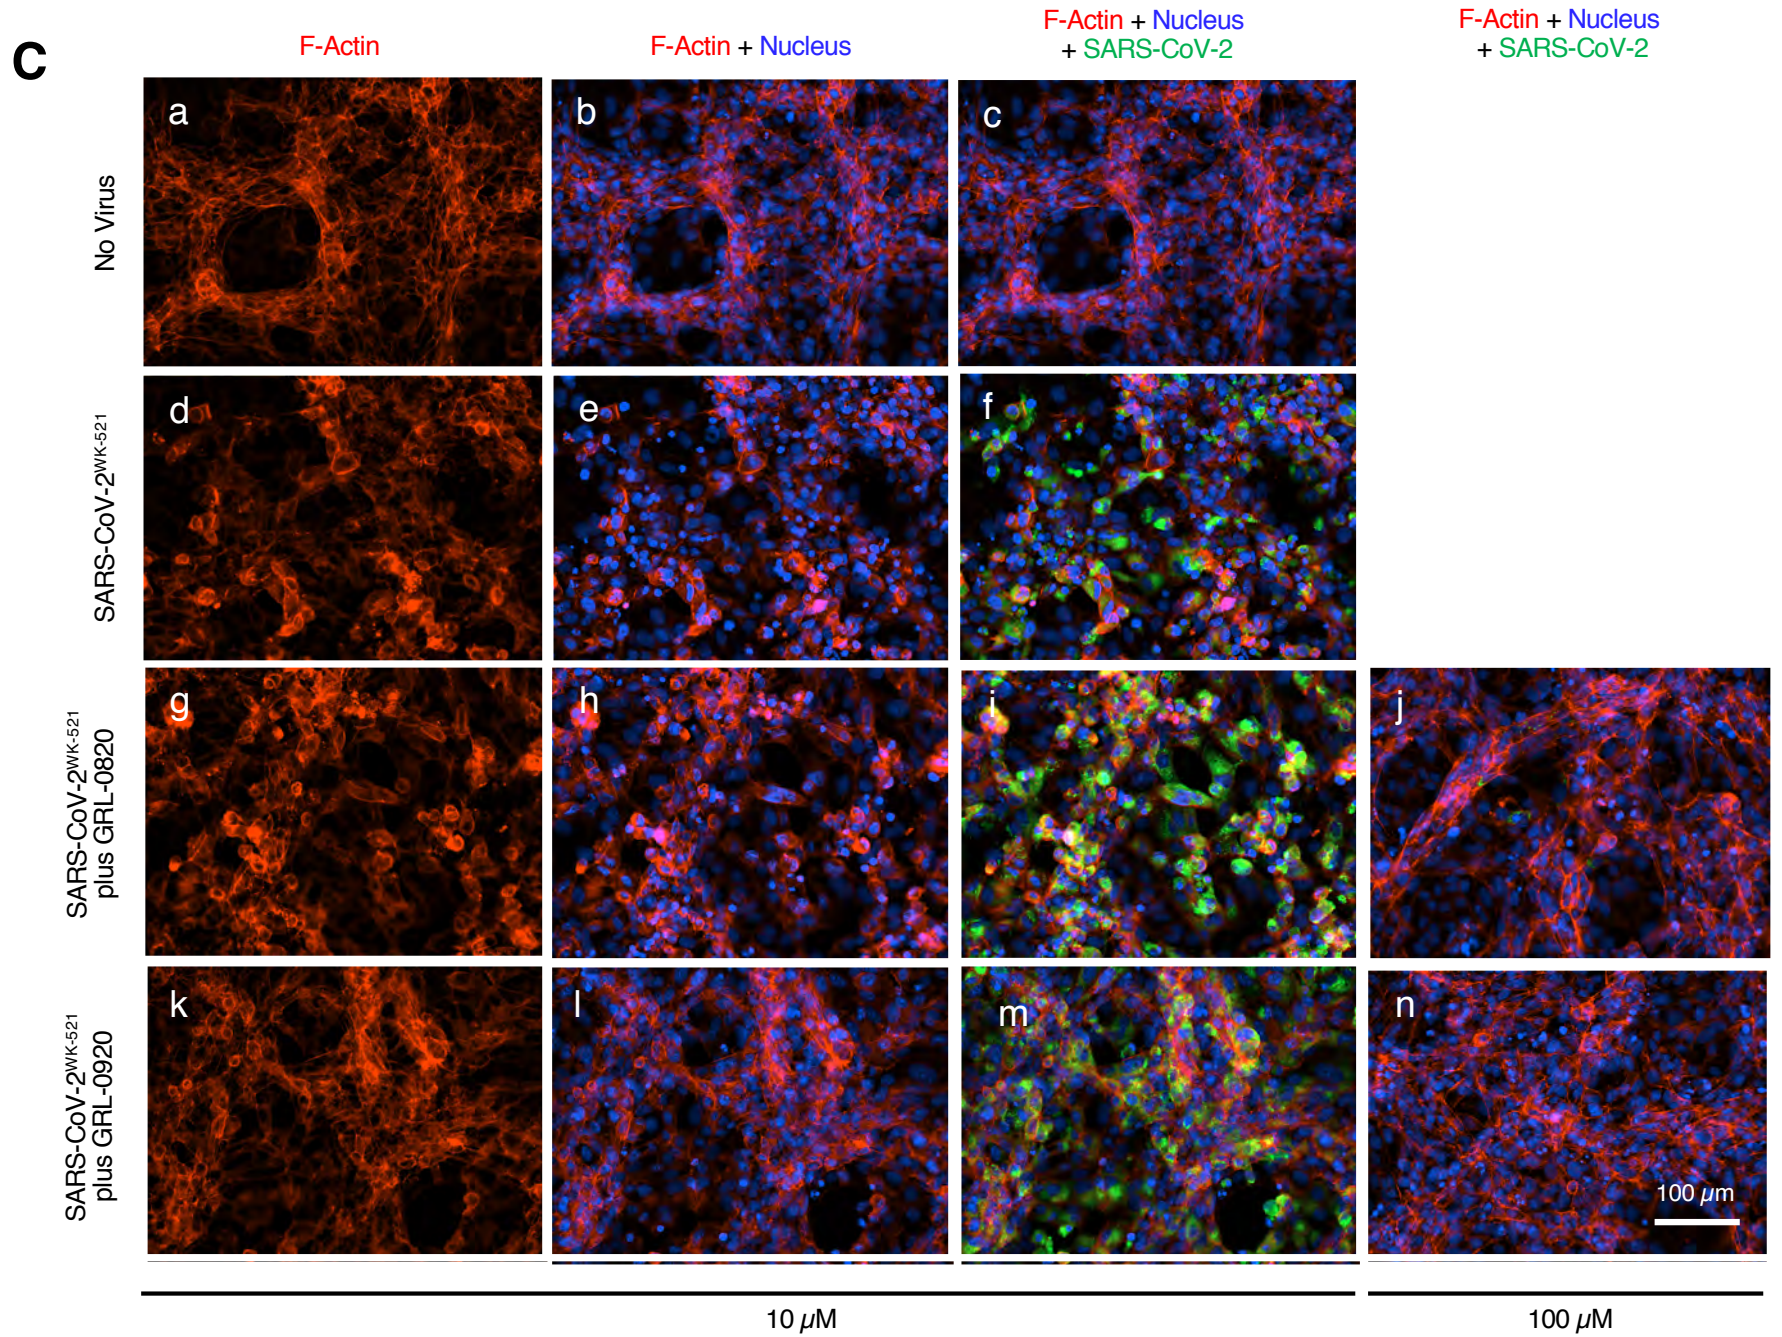

Supplement: mBio.01833-20-sf004.pdf [file mBio.01833-20-sf004.pdf]

# Figure S5.

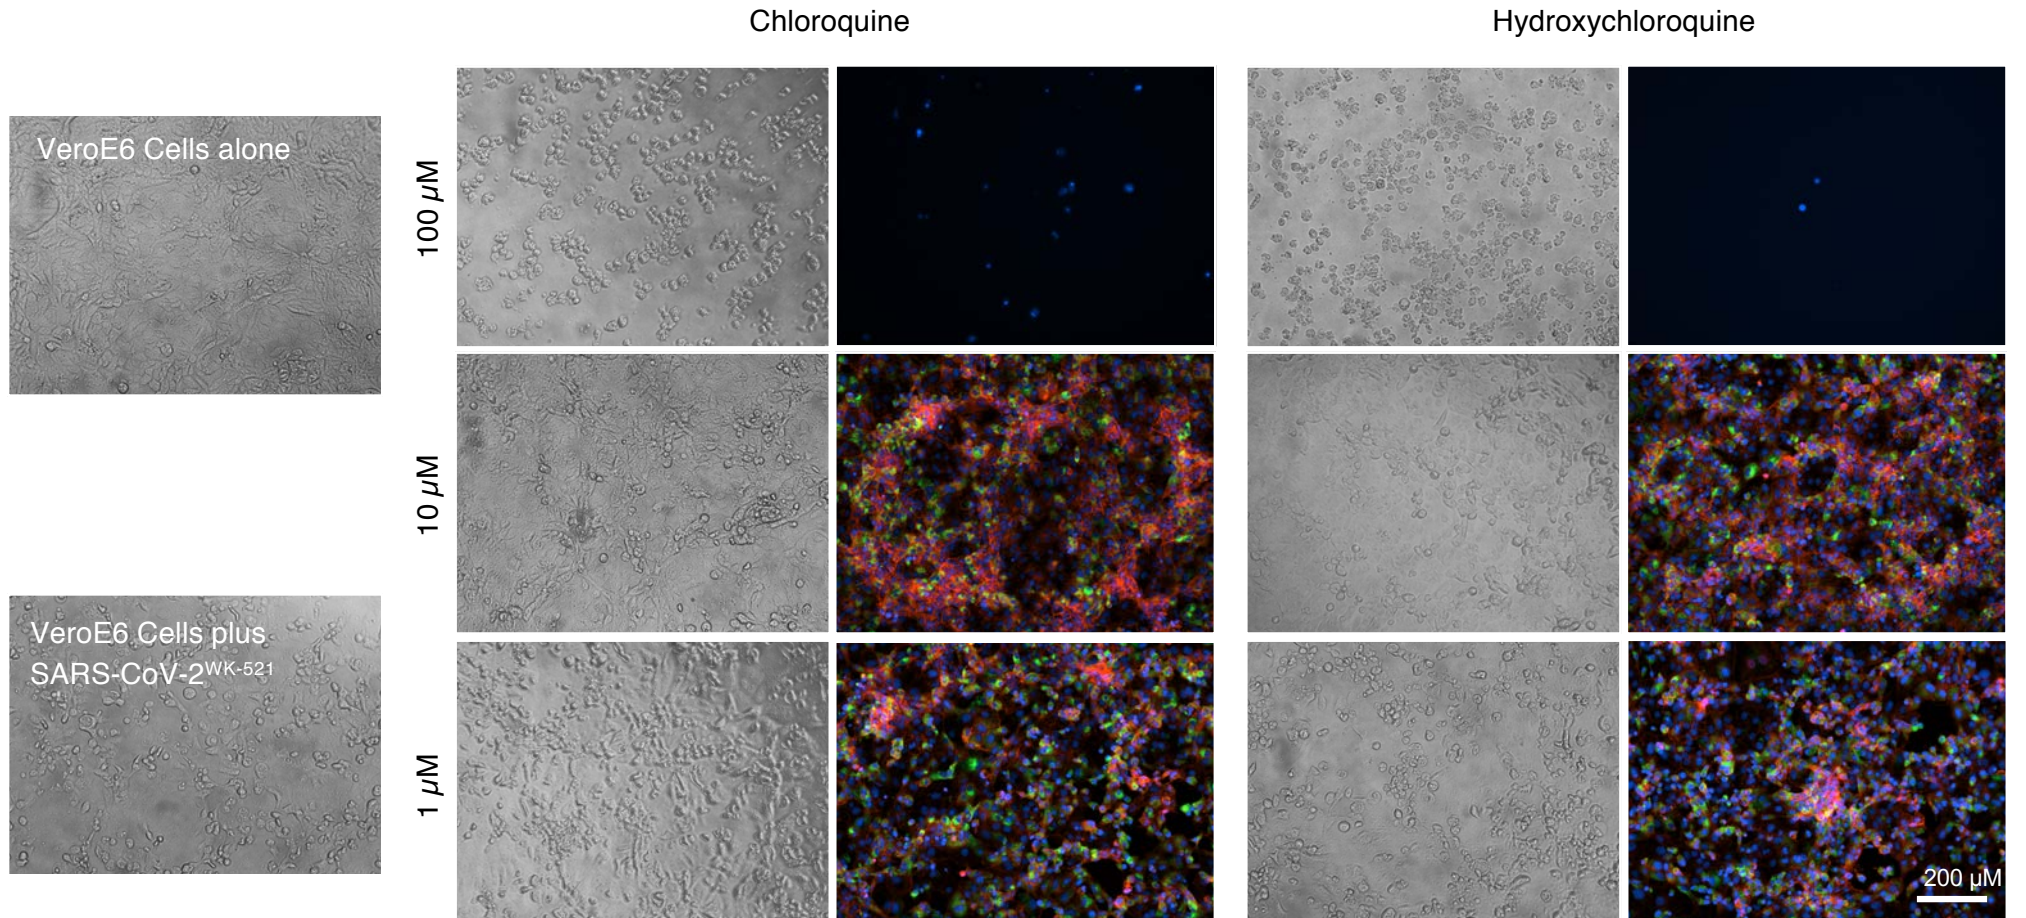

Supplement: mBio.01833-20-sf005.pdf [file mBio.01833-20-sf005.pdf]

# Figure S6.

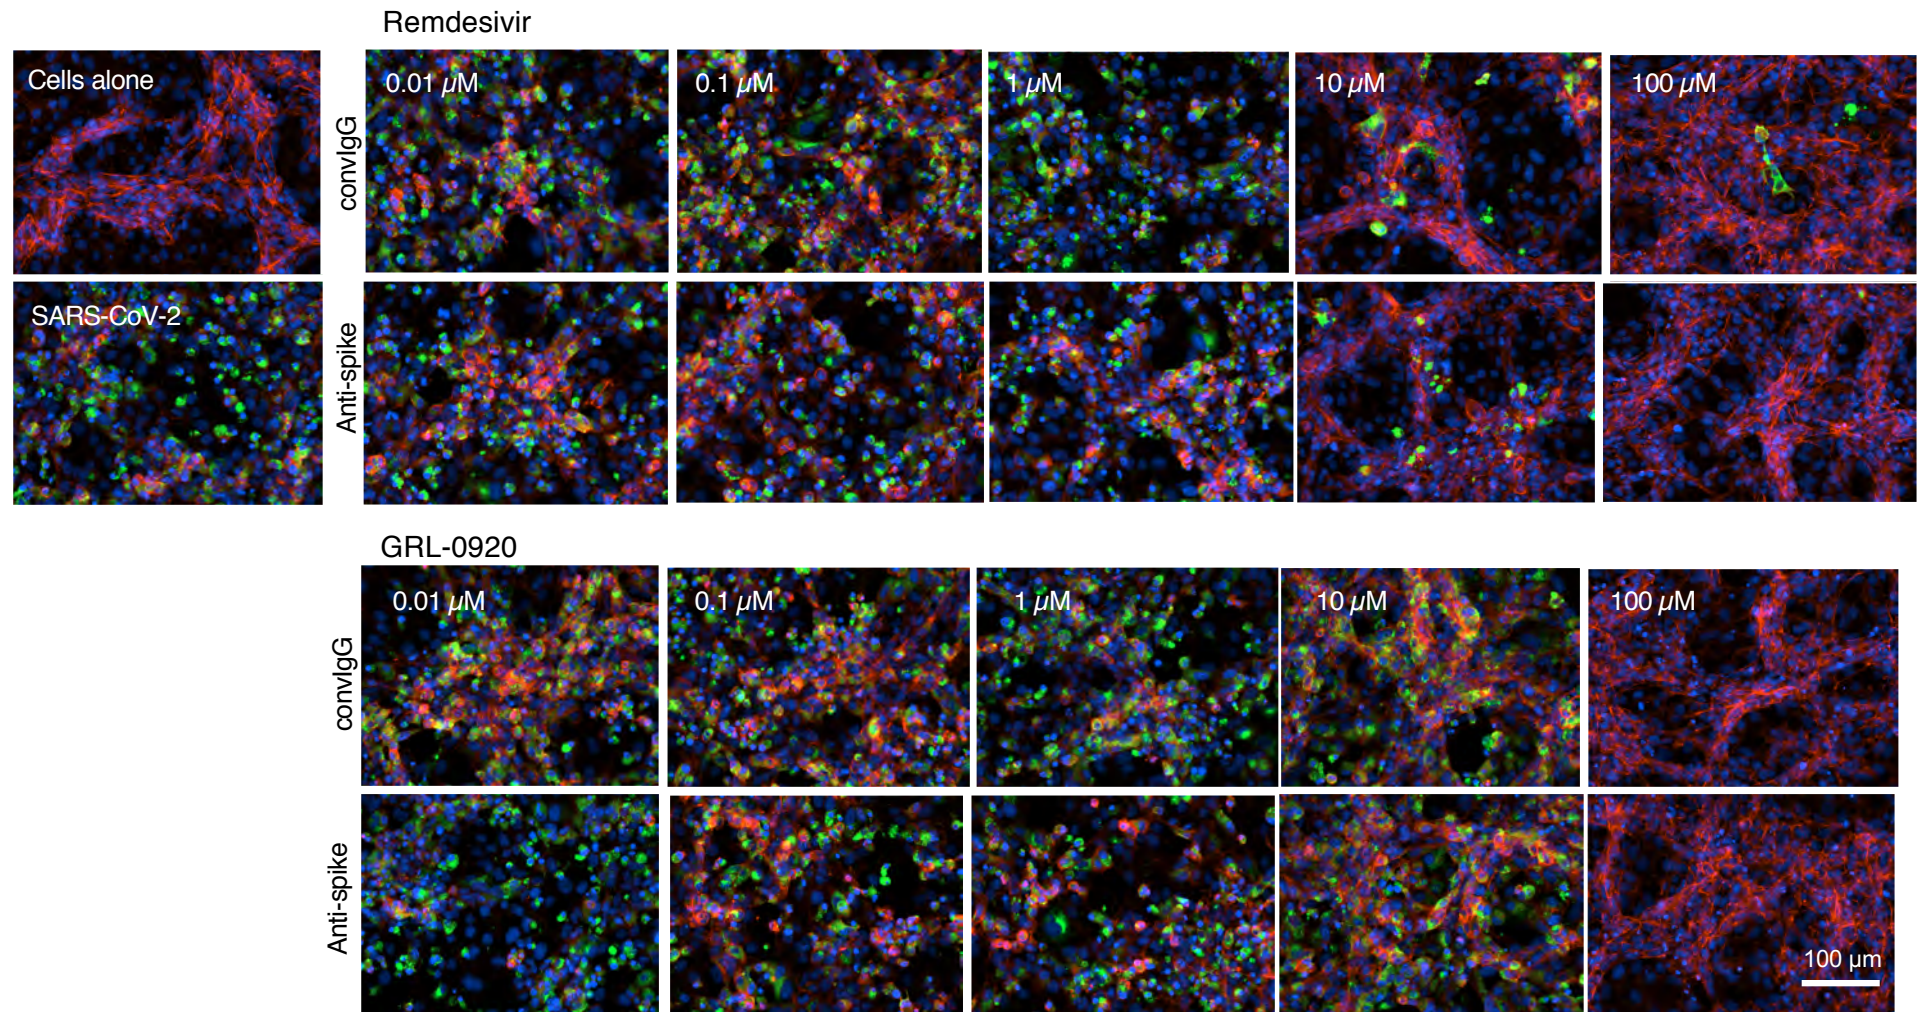

Supplement: mBio.01833-20-sf006.pdf [file mBio.01833-20-sf006.pdf]
